# Supplementary material
Source: publisher site journal article supplement (https://www.dovepress.com/article/244294)
Supplement: Supplementary file 1 [file get_supplementary_file.php]

| Prognostic  **Supplement table** Summary of additional characteristics (number of patients per each prognostic model, inclusion, exclusion criteria, year of inclusion, variables included in each model, treatment, no of centers that provided data, and no of pts in compared models) of each study  model 24 | No pts in novel model | Inclusion criteria  Training/ Validation set (No pts) | Exclusion Criteria | Year of inclusion | Variables included in each model | Treatment (No pts) | Multicenter study (No of centers) | No pts in compared risk groups/3-year OS |  |
| --- | --- | --- | --- | --- | --- | --- | --- | --- | --- |
| IPI 1 | 2031 | Aggressive B cell lymphoma, pts who completed therapy by 1987 |  | 1982-1987 | Age, ECOG PS, stage, LDH, EN sites | Combination chemotherapy containing doxorubicin | Yes (16) |  |  |
| aaIPI | 761 | >60 years |  |  | Stage, LDH, EN sites |  |  |  |  |
| aaIPI | 1274 | ≤60 years |  |  | Stage, LDH, EN sites |  |  |  |  |
| β2M-IPI 53 | 71 | DLBCL |  | 1980-1995 | Age, ECOG PS, stage, LDH, EN sites, β2M | CHOP/ CHOP-like regimen | No | IPI =104  L 47/(~75.8)  LI 15/(~64.0)  HI 18/(~35.1)  H 24/(~9.8) | aaIPI=69  L 4/NA  LI 0/NA  HI 18/NA  H 47/NA |
| Barrans et al 13 | 155 | Nodal DLBCL | PMBCL, Burkitt lymphoma, DLBCL with evidence of an underlying FL, anaplastic variants, and primary extranodal disease | 1985- 1997 | IPI, Bcl-2, GC expression | predominantly CHOP,  RT alone (9), no treatment (12) | No | IPI=143  L 67/(~76.7)  LI 38/(~35.7)  HI 26/NA  H 12/(~7.9) |  |
| R-IPI 4 | 365 | Age>16 years (324 pts DLBCL, 36 pts PMBCL, two pts IBL, two pts IVDL, one pt TCHRBCL) | HIV, secondary malignancy, underlying indolent lymphoma, major coincident illness | 1981-January 2005 | Age, ECOG PS, stage, LDH, EN sites | R-CHOP (all pts) | Yes | IPI=365  L 28/(~83.0)  LI 27/(~82.2)  HI 21/(~61.7)  H 24/(~60.1) |  |
| ALC/R-IPI 55 | 88 | CD20+ aggressive B large cell lymphoma (89 pts DLBCL, 12 pts PMBCL, 15 pts associated or developed from low grade lymphoma), age>18 years, eligibility for anthracycline-based chemo | PCNSL, CNS involvement, HIV infection or unresolved HBV, prior chemo or steroid administration in the previous 30 days | January 2003-March 2007 | ALC, R-IPI | R-CHOP (79), R-MACOP-B (17), R-CHOP-14 (5). Chemo+RT in pts with stage I disease and in pts with PMBCL.CNS prophylaxis (23) | NA | R-IPI=88  L 12/(~100.0)  I 34/(~85.7)  H 42/(58.1) |  |
| E-IPI 3 | 267 | DLBCL, age≥60 |  |  | Age, LDH, ECOG PS, stage, EN sites | R-CHOP | Yes | IPI=267  L 32/(83.0)  LI 75/(80.0)  HI 88/(68.0)  H 72/(43.0)  R-IPI=267  L 0/NA  I 107/(81.0)  H 160/(57.0) | aaIPI=267  L 32/(83.0)  LI 93/(78.0)  HI 118/(59.0)  H 24/(35.0) |
| ALC/AMC 42 | 366 | DLBCL | HIV | 1993-2007 | ALC, AMC | CHOP (110), R-CHOP (256). Additionally 88 pts received RT | NA | IPI=366  L 158/(~86.0)  LI 94/(~66.7)  HI 75/(~63.7)  H 39/(~42.4) |  |
|  | 256 |  |  |  | Same as above | Only R-CHOP treated cases |  |  |  |
| Salles et al 7 | 284 | DLBCL, antracyclin-based therapy, availability of complete clinical data at study registration and an updated follow-up of at least 3-years, and the possibility of retrieving parafﬁn blocks from the diagnostic biopsy samples |  | February 1998-August 2005 | IPI, Bcl-2 expression, Ki-67 expression | CHOP/r CHOP-like with/without R | Yes | IPI=347  L 94/(~84.0)  LI 80/(~84.0)  HI 87/(~71.3)  H 86/(~51.0) |  |
| SIL index 8 | 366 | DLBCL | IVBL, PMBCL, TCHRBCL, HIV | 2003-2009 | Stage, sIL-2R, LDH | R-CHOP+/- RT. Forty pts received RT while 45 pts received CNS prophylaxis | No | IPI=366  L 157/NA  LI 91/NA  HI 59/NA  H 59/NA | R-IPI=366  L 48/(~95.9)  I 201/(~89.4)  H 117/(~71.3) |
| Lanic et al 12 | 45 | DLBCL |  | October 2004-January 2009 | aaIPI, i-PET, GEP ABC | R-CHOP (42), R-CHOP-like regimen (15) | No | aaIPI=57  0-1=17/NA  2-3=40/NA |  |
| Huang et al 9 | 274 | CD20+ DLBCL | PCNSL, HIV | January 2003-December 2009 | ECOG PS, stage, ALC | R-CHOP/R-CHOP-like (all pts) | No | IPI=274  L 85/(95.0)  LI 55 (83.0)  HI 66 (50.0)  H 68 (45.0) | R-IPI=274  L 30 (100.0)  I 110 (87.0)  H 134 (47.0)  ALC/R-IPI=274  L 121 (94.0)  I 105 (60.0)  H 48 (29.0) |
| IMI 49 | 229 | DLBCL | IVBL, PEL, PMBCL, CNS involvement at diagnosis, history of indolent lymphoma, HIV | January 2004-January 2011 | ALC, AMC | R-CHOP (all pts) | No | IPI=229  L 77/(~86.5)  LI 57/(~80.3)  HI 38/(~70.2)  H 57/(~51.8) |  |
| AMLPI 50 | 245 | DLBCL |  |  | ALC, AMC | R-CHOP (all pts) | Yes | IPI=244  L 100/(~86.7)  LI 66/(~87.3)  HI 57/(~63.5)  H 21/NA |  |
| NCCN-IPI 2 | 1650 | DLBCL, >18 years,  no more than one histologic subtype, HIV, HCV, HBV  NCCN training set (1650) BCCA cohort (1138) | Underlying lymphoma, secondary malignancy, major illness that preclude an attempt at curative therapy | June 2000-December 2011 | Age LDH, ECOG PS, stage, EN sites | R-CHOP | Yes (7) | IPI=1650  L 627/(~93.8)  LI 429/(~80.2)  HI 363/(~70.0)  H 231/(~61.7) |  |
| ABE 4 et al 31 |  | 379  Validation was performed on an independent cohort selected from the same population approximately a year later than collecting the data for the ABE scores construction | CNS, missing data | April 2002-May 2010 | Age, bulky, ECOG PS | R-CHOP (all pts) | Yes | IPI=374  L 90/(83.0)  LI 93/(75.0)  HI 98/(65.0)  H 93/(51.0)  aaIPI=372  L 83/(82.0)  LI 117/(77.0)  HI 106/(64.0)  H 66/(40.0) | E-IPI=372  L 142/(82.0)  LI 80/(72.0)  HI 91/(59.0)  H 59/(41.0) |
| ABE 3 | 379 | DLBCL |  |  | Age, bulky, ECOG PS |  |  | R-IPI=374  L 5/(80.0)  I 178/(79.0)  H 191/(58.0) | ALC/R-IPI=374  L 164/(80.0)  I 141/(63.0)  H 69/(50.0) |
| Nols et al 60 | 73 |  | HIV, HBV, HCV | July 2003-November 2009 | AaIPI, i-PET, ∆SUVmax | CHOP (1), R-mini-CHOP (8), R-CHOP14 (11), R-CHOP21 (36), R-ACVBP (17) | Yes (2) | IPI=73  L+LI 36/NA  HI+H 37/NA |  |
| Melchardt et al 10 | 403 | DLBCL | HIV | 2004-2013 | Age, LDH, ECOG PS, stage, EN sites, albumin | R-CHOP/R-CHOP-like regiments | Yes (2) | IPI=499  L 172/(90.9)  LI 151/(72.2)  HI 114/(63.5)  H 62/(45.0) | NCCN-IPI=499  L 46/(97.7)  LI 199/(83.8)  HI 189/(67.5)  H 65/(39.5) |
| Alternative NCCN-IPI for elderly | 353 |  |  |  | Age, LDH, ECOG PS, stage, EN sites |  |  |  |  |
| L-GPS 14 | 213 | CD20+ DLBCL which did not originate from the CNS, no prior chemo or RT, no infectious disease at initiation of chemo, available clinical and laboratory data at the time of treatment and follow-up | HIV, pts with noninfectious inflammatory diseases such as RA rheumatoid arthritis | October 2003-December 2011 | Hypoalbuminemia, CRP, LDH | R-CHOP (all pts) | No | IPI=213  L 106/(~91.5)  LI 40/(~78.0)  HI 30/(~53.0)  H 37/(~30.5) |  |
| DLBCL-PI 32 | 1803 | DLBCL | Pts who were not treated or did not received R, PCNSL, HIV, missing laboratory data | 2000-2010 | Age, ECOG PS, LDH, stage, albumin | R-CHOP/R-CHOP-like | Yes | IPI=1990  L 664/NA  LI 563/NA  HI 461/NA  H 302/NA |  |
| aaDLBCL-PI | 1169 | aaDLBCL-PI≤70 years |  |  | ECOG PS, LDH, albumin, EN sites |  |  |  |  |
| ALC/AMC PS 43 | 148 | DLBCL | PCNSL, testicular, breast lymphoma, paranasal involvement, received CNS prophylaxis, pts who underwent not more than IV cy R-chemo, missing data | January 2001-December 2010 | ALC, AMC | R-CHOP-like regiments (all pts) | No | IPI=148  L 50/NA  LI 38/NA  HI 38/NA  H 22/NA |  |
| Kanemasa et al 40 | 274 | DLBCL, available baseline β2M | HIV, CNS, transformed lymphoma from a prior indolent B cell lymphoma | September 2004-March 2015 | Age, ECOG PS, stage, β2M | R-CHOP/R-CHOP-like regiments (all pts) | No | NCCN-IPI=274  L 17/(100.0)  LI 101/(~92.1)  HI 102/(~77.1)  H54/(27.1) |  |
| Kong et al 56 | 105 | DLBCL, i-PET after II cy of therapy, post therapy PET-CT | PCNSL, children/adolescents, chemo missing i-PET after II cy of therapy | December 2009-October 2014 | Age, stage, GEP ABC, i-PET | R-CHOP (all pts) | No | IPI=105  L 42/NA  LI 30/NA  HI 16/NA  H 17/NA |  |
| Chen et al 37 | 817 | DLBCL, received at least two cy of therapy between October 2001 and December 2011 | HIV, Secondary malignancy | October 2001- December 2011 | ANC, AMC, ECOG PS, EN sites, β2M | R-CHOP (643), R-hyperCVAD/R-MA (127), R-EPOCH (40). Two pts with CD20- disease were treated with EPOCH and three pts with hyperCVAD/MA. Two pts received RT alone for localized disease. Consolidation treatments were given to pts in remission including RT (196), SCT (16, seven of whom received both RT and SCT). | Yes | IPI=817  L 311/(~95.8)  LI 182/(~85.2)  HI 197/(~71.5)  H 127/(~66.0) |  |
| M-IPI-R 11 | 471 | DLBCL |  |  | Age, ECOG PS, stage, LDH, EN sites, CD37 expression, ABC subtype GEP | R-CHOP/CHOP |  | IPI=499  L 197/(~86.7)  LI 119/(~74.0)  HI 107/(~56.0)  H 76/(~43.3) |  |
| IHC+IPI | 453 |  |  |  | Age, ECOG PS, stage, LDH, EN sites, CD37, Mychigh, Bcl-2high |  |  |  |  |
| KPI 34 | 323 | DLBCL  Training set (323 pts)/ validation set (142 pts) | HIV, underlying other hematological diseases, transformed DLBCL, PCNSL, major coincident illness that precluded an attempt at curative treatments | January 2006-April 2014 | LDH, ECOG PS, albumin, EN sites | R-CHOP/R-CHOP-like therapy +/-RT | Yes (3) | R-IPI=NA  NCCN-IPI=NA |  |
| ACA 35 | 555 | DLBCL including EBV-positive DLBCL of the elderly and testicular lymphoma, age≥65 years, received at least I cy of R-CHOP | Disease involving CNS | January 2001 -December 2012 | Age, CCI, albumin | R-CHOP (all pts) | Yes | IPI≥3  316 |  |
| Saygin et al 6 | 312 | DLBCL, age≥60, received at least I cycle of treatment  Training set (555 pts)/ validation (281 pts) |  | 2004-2014 | IPI, CCI | R-CHOP (349), R-CVP (9), R-CEOP (8), CHOP (6), R-EPOCH (5), other (22) | No | IPI= 413  1-2 =131  3-5= 182 |  |
| GELTAMO IPI 36 | 1672 | DLBCL, age ≥18 years, DLBCL treated with curative intent with the combination of R and doxorubicin-containing chemotherap. All histological subtypes of DLBCL and pts with HBV, HCV, HIV, pts with primary nodal and primary EN presentation  Training set (1230 pts)/ validation set (618 pts) | Primary testicular lymphoma, PCNSL, treatments of non-curative intent with shorter (less than 6 cycles) or lower doses (mini-R-CHOP or similar dose reductions), or non-adriamycin-containing combinations were not acceptable. The presence of a concomitant or previous tumor in the previous 5 years | January 1998-July 2014 | Age, ECOG PS, stage, LDH, β2M | CHOP/CHOP-like variants (919) with liposomal doxorubicin), R-EPOCH, R-MegaCHOP, eventual addition of bortezomib or lenalidomide to CHOP. Three pts received the anti-CD-20 agent GA-101 | Yes (20) | IPI=1764  L 593/(~91.9)  LI 402/(~83.0)  HI 440/(~72.7)  H 329/(~54.7) | NCCN-IPI=1777  L 225/(~95.3)  LI 613/(~88.0)  HI 658/(~73.6)  H 281/(~54.4) |
| PA score 51 | 391 | DLBCL | PMBCL, PEL, pts with a prior history of indolent lymphoma, HIV | January 2004-June 2014 | Albumin, PLC | R-CHOP/R-CHOP-like regiments | Yes (2) | IPI=391  L 127/(~90.4)  LI 89/(~80.3)  HI 75/(~70.7)  H 100/(~56.8) | NCCN-IPI=391  L 26/(~100.0)  LI 143/(~91.0)  HI 141/(~70.3)  L 81/(~49.6) |
|  | 291 | Inclusion: age>60 |  |  | Albumin, PLC |  |  |  |  |
| Kang et al 38 | 621 | DLBCL, age>20, life expectancy>6 months  Training set (621 pts)/validation set (434 pts) | CNS involvement | March 2004-June 2012 | Age, LDH, ECOG PS, stage, b2M | R-CHOP (all pts) | Yes | IPI=621  L 299/(~90.2)  LI 105/(~82.8)  HI 116/(~69.9)  H 101/(~53.3) | NCCN-IPI=621  L 129/(~95.6)  LI 272/(~83.7)  HI 176/(~70.1)  H 44/(~39.3) |
| ICPS 44 | 564 | DLBCL, R-CHOP | Pts treated with chemo other than R-CHOP as first-line therapy, PCNSL, HIV, pts whose dose was reduced >20%, pts who did not complete their course of R-CHOP, pts with clinical evidence of acute infection or chronic inflammatory disease | November 2006- December 2013 | CRP, albumin, LMR | R-CHOP (all pts) | No | IPI=564  L 309/(87.6)  LI 96/(72.5)  HI 96/(57.0)  H 63/(51.5) |  |
| cNCCN-IPI 39 | 958 | DLBCL (DLBCL, NOS, 44 pts PMBCL, 33 pts PCNSL, 24 pts TCHRBCL, five pts primary cutaneous DLBCL, leg type, one pt EBV-positive DLBCL of the elderly), no history of previous lymphoma, min I cy of therapy |  | January 2000-December 2015 | CCI≥2, age, ECOG PS, stage, LDH, EN sites | R containing regiments (931), pts with PCNSL (31) received HD-MTX +/-WBRT | Yes (4) | IPI=962  L 430/(84.0)  LI 259/(65.0)  HI 184/(45.0)  H 89/(39.0) | NCCN-IPI=962  L 155/(91.0)  LI 435/(74.0)  HI 301/(55.0)  H 71/(27.0) |
|  | 426 | ≥60 years |  |  | CCI≥2, age, ECOG PS, stage, LDH, EN sites |  |  |  |  |
| Candelaria et al 54 | 131 | DLBCL, age≥65, HIV |  | January 2011-June 2015 | ECOG PS, b2M, bulky disease, Hb | R-CHOP, R-ChOP, R-COP | No | IPI=141  L 24/NA  LI 31/NA  HI 42/NA  H 44/NA |  |
| Zhao et al 45 | 309 | DLBCL, R-CHOP | History of malignancy, immunosuppression or previous treatment | March 2009-February 2015 | PLR, IPI/or aaIPI, b2M | R-CHOP (all pts) | No | IPI=309  L 112/(~59.9)  LI 95/(~53.9)  HI 56/(~11.5)  H 46/NA | aaIPI=NA  L NA/(~90.0)  LI NA/(~72.9)  HI NA/(~48.1)  H NA(~38.1) |
| IACA index 61 | 99 | DLBCL, age≥65, received R-CHOP based treatments | Lack of data | January 2003-December 2016 | IADL, IADL, ACA | R-CHOP/ R-reduced intensity CHOP, R-miniCHOP, R-COP | NA | ACA=99  L 39/NA  LI 31/NA  HI 26/NA  H 3/NA |  |
| Pardal et al 57 | 108 | DLBCL, age≥80, DLBCL de novo/ transformed/FL grade 3b |  | January 2002-December 2014 | Age, R-IPI, CIRS | R-CHOP (52), R-CHOP (56) at reduced doses (R-CHOPr), R-CVP (30), CHOP (22), palliative treatment (55) consisting of cyclophosphamide +/- prednisone +/- vincristine | Yes (19) | R-IPI=245  I 99/NA  H 146/NA |  |
| Matsumoto et al 58 | 185 | DLBCL, R-CHOP | Transfer to another hospital after diagnosis, other regimens, Rt alone, received supportive care only because of poor performance status, double cancer, early death within 30 days, lack of information | 2004-2014 | Stage, anaemia | R-CHOP (all pts). | No | NA |  |
| Lipo-PI 16* | 367 | No liver diseases, no previous malignancies, complete data, R-CHOP/R-CHOP-like, no treatment with drugs known to affect lipid metabolism (statins/fibrates)  Training set (367 pts)/ validation set (183 pts) | HIV | January 2006-December 2016 | Lipid level, ECOG PS, stage, LDH, EN sites | R-CHOP (404), (DA)-EPOCH-R (117),  R-CHOP like regimens (21, R-CDOP, R-CEOP), R-mini CHOP (8) | No | NCCN-IPI=NA  L NA/(100.0)  LI NA/(82.8)  HI NA/(56.9)  H NA/(31.9) | NCCN-IPI=NA  L NA/(100.0)  LI NA/(82.8)  HI NA/(56.9)  H NA/(31.9) |
| AGR 15 | 232 | DLBCL, received at least one cycle of R−CHOP as ﬁrst line therapy, no prior chemo or RT | Pts <18 years of age, previous frontline therapy other than the R-CHOP, histological transformation from low-grade lymphoma to DLBCL, active infection at the time of starting R-CHOP therapy | January 2004- February 2017 | Albumin globulin ratio | R-CHOP (all pts) | No | IPI=93  L+LI=34  HI+HI=59 |  |
| AGR 41 | 335 | DLBCL | HIV, PCNSL, missing laboratory parameters at diagnosis | January 2010- December 2015 | Albumin globulin ratio | R-chemo (222), chemo (113) | No | IPI=335  L 126/NA  LI+HI 149/NA  H 60/NA | IPI=93  L+LI=34  HI+HI=59 |
| Keane et al 33 | 141 | DLBCL |  | 2004-2013 | LAR; IPI | R-CHOP | Yes (2) | IPI=206  NA |  |
| Li et al 47 | NA | DLBCL, pts who received iPET/CT after two or four cy of chemo, pts treated with a standard dose CHOP or R-CHOP |  | October 2013-January 2017 | ΔSUVmax, IPI | R-CHOP | No | IPI=77  L 33/NA  LI 23/NA  HI 16/NA  H 5/NA |  |
| Toledano et al 46 | 181 | DLBCL, staging with FDG-PET/CT at baseline (PET0) and after four cy (iPET 4) of chemo and a follow-up by at least 2 years after completion of first-line therapy |  | July 2005- September 2014 | RDS, IPI | R-CHOP, R-CHOP-like (eg R-miniCHOP, R-COPADEM, R-ACVBP | No | IPI=181  L 39/NA  LI 508/NA  HI 55/NA  H 37/NA |  |
| Chen et al 48 | 66 | DLBCL-NOS | Recurrent DLBCL, DLBCL transforming from small B cell lymphoma | January 2014-April 2017 | Tumor-infiltratingT lymphocytes, CD4:CD8 | R-CHOP/R-CHOP-like regimens, surgery, RT, supportive care only due to advanced stage with poor general condition and chemo intolerance, one pt denied treatment | No | R-IPI=55  NA |  |
| HP index 52 | 89 | Nodal DLBCL, NOS, no detectable acute inflammation, chronic active inflammatory disease, or a bleeding disorder | HIV, humanT-cell lymphotropic virus type, cases of an iatrogenic immunodeficiency-associated lymphoproliferative disorder | 2012-2017 | Hb level, PLC | R-CHOP (all pts) | No | IPI=89  L 20/(87.0)  LI 19/(84.0)  HI 30/(50.0)  H 20/(38.0) |  |
| DM-PI 59 | 553 | DLBCL, complete clinical information and follow-up data, without previous malignancies, HIV negative | dose reduction in therapy due to BUN, creatinine levels at diagnosis more than 1.5-fold upper limit of normal, or left ventricular ejection fraction below 55%, pts who died of accident or other medical conditions with no relation to DLBCL | January 2008-November 2016 | DM, IPI | R-CHOP (404), DA-EPOCH (118), R-CHOP-like regimens (22) including R-CDOP, R-CEOP, R-mini CHOP (9) | No | IPI=553  L NA/(92.8)  LI NA/NA  HI NA/NA  H NA/(51.8) |  |
| Nomograms |  |  |  |  |  |  |  |  |  |
| Chow et al 25 | 76 | DLBCL | Pts who did not receive an iPET for logistics reasons | 2005-2010 | IPI, iPET-CT | R-CHOP | No | IPI=76  L 29/NA  LI 21/NA  HI 13/NA  H 13/NA |  |
| Go et al 29 | 187 | DLBCL | Age<18 years, induction therapy other than standard R-CHOP-21, Richter’s transformation from CLL, pts with missing data in any one of the baseline characteristics | June 2003-February 2015 | Sarcopenia, age, ECOG PS, stage, LDH, EN sites | R-CHOP | No | IPI=187  L+LI 107/NA  HI+H 80 /NA  NCCN-IPI=187  L+LI 94/NA  HI+H 93/NA | R-IPI=187  L 29/NA  I 84/NA  H 74/NA |
| Biccler et al28 | 5173 | DLBCL, no CNS (parenchymal, leptomeningeal, and/or intravitreal) involvement at baseline, age ≥ 18 years at diagnosis, first-line treatment with R-CHOP, R-CEOP or R-CHOEP  Training set (2759 pts)/ validation set (2414) |  | January 2006 onward (LYFO), July 2007 onward (SLR) | Sex, stage, ECOG PS, B symptoms, bulky disease, No EN sites, Hb, leukocyte level, lymphocyte level, albumin, LDH | R-CHOP, R-CEOP or R-CHOEP | Yes (2) | IPI  NCCN-IPI |  |
| Go et al 30 | 232 | DLBCL, pts treated with R-CHOP therapy, baseline complete blood counts were available | Pts <18 years of age, pts treated with frontline therapy other than the R-CHOP regimen, who had histologic transformation from low-grade lymphoma to DLBCL, and who had active infection at the time of starting R-CHOP therapy | January 2004-February 2017 | NLR, age, LDH, ECOG PS, stage, EN sites | R-CHOP | No | IPI=232  L+LI 127/NA  H+HI 105/NA  NCCN-IPI=232  L+LI 107/NA  H+HI 125/NA | R-IPI=232  L 32/NA  I 95/NA  H 105/NA |
| Han et al 27 | 1070 | DLBCL  Training set (748 pts)/ validation set (322 pts) | Age<18 and > 80 years, pts with missing clinical information or IHH, lost to follow-up after treatment | June 2006-December 2012 | Age, ECOG PS, stage, LDH, high Ki-67 expression, positive CD5 expression, β2-M | Chemo+RT (489), chemo alone (527), surgery+ chemo+ RT (35). A total of 604 pts received R-CHOP or R-CHOP-like regimens | No | IPI=748  L 415/(78.6)  LI 178/(64.9)  HI 88/(48.2)  H 67/(37.8)  R-IPI=748  L 195/(91.5)  I 398/(72.4)  H 155/(43.5) | NCCN-IPI=748  L 241/(85.1)  LI 371/(72.9)  HI 124/(42.4)  H 12/(38.7) |
| Zhong et al 2019 26 | 538 | DLBCL  Training set (228 pts)/ validation set (310 pts) |  |  | LDH, sIL-2R, TNFα, LMR | R-CHOP, R-CEOP | NA | IPI=228  L 123/(92.6)  LI 41/(77.0)  HI 46/(66.7)  H 18/(59.2)  Inflammatory IPI=179  L 99/(95.9)  LI 36/(90.0)  HI 32/(74.7)  H 12/(54.7) | NCCN-IPI=228  L 66/(93.7)  LI 102/(87.0)  HI 55/(80.2)  H 5/(60.1)  ICPS=228  L 37/(97.1)  HI 111/(87.6)  HI 68/(74.7)  H 12/(66.2) |

aaDLBCL PI – age adjusted DLBCL PI; aaIPI – age adjusted IPI; ABC – Activated B cell; ABE – Age, bulk, ECOG; ACA – Age, Comorbidity, Albumin; ALC – Absolute lymphcytic count; AMC – Absolute monocyte count; AMPLI – Absolute monocyte and lymphocyte counts prognostic index; PS – prognostic score; ANC – Absolute neutrophil count; β2M – β-2 microglobulin; BCCA – British Columbia Cancer Agency; Bcl-2 – B cell lymphoma 2; BUN – blood urea nitrogen; CLL – chronic lymphocytic leukaemia; CCI – Charlson Comorbidity Index; cNCCN-IPI – Comorbidity NCCN-IPI; Chemo – chemotherapy; CNS – Central nervous system; CIRS – Cumulative illness rating scale; CRP – C reactive protein; cy – cycle; ∆SUVmax – Maximum standardized uptake value; DLBCL – Diffuse large B cell lymphoma; DLBCL PI – DLBCL prognostic index; DS – Deauville score; ECOG – Eastern Cooperative Oncology Group; EN – Extranodal; E-IPI – Elderly IPI; FL – Follicular lymphoma; GC – Germinal center; GEP – Gene expression profiling; H – High; Hb – haemoglobin; HBV – Hepatitis B virus; HCV – Hepatitis C virus; HI – High intermediate; HIV – Human immunodeficiency virus; I – Intermediate; IADL – Instrumental Activities of Daily living; ICPS – Inflammation-based cumulative prognostic score system; IHH – Immunohistochemistry; IHC+IPI – IPI plus immunohistochemistry; iPET – Interim-positron emission tomography; IPI – International Prognostic Index; IMI – Immunological index; IVBL – Intravascular B lymphoma; KPI – Kyoto Prognostic Index; L – Low; LDH – Lactate dehydrogenase; LYFO -Danish Lymphoma Registry; ULN – Upper limit normal; L-GPS – LDH plus Glasgow prognostic score; LMR – lymphocyte to monocyte ratio; Lipo-PI – Lipoprotein prognostic index; LI – Low intermediate; M-IPI-R – Molecularly adjusted IPI for R-CHOP; N – Normal; NA – not applicable; NCCN-IPI – National Comprehensive Cancer Network; PLC – platelet count; PA score – Platelet-albumin score; pt – Patient; pts – patients; PCNSL – Primary central nervous system lymphoma; PEL – Primary effusion lymphoma; PLR – Platelet to lymphocyte ratio; PMBCL – Primary mediastinal B cell lymphoma; RA – Rheumatoid arthritis; R-IPI – Revised-IPI; sIL-2R – Soluble interleukin-2 receptor; SLR -Swedish Lymphoma Registry; SCT – stem cell transplantation; TCHRBCL – T-cell/histiocyte-rich B cell lymphoma, TNFα – tumor necrosis factor α

Therapy: ACVBP – doxorubicin, cyclophosphamide, vindesine, bleomycin, prednisone; CHOP – cyclophosphamide, doxorubicin, vincristine, prednisone; HD- MTX – high dose- Methotrexate; (DA)-EPOCH – (dose-adjusted) etoposide, prednisone, vincristine, cyclophosphamide and doxorubicin; hyperCVAD/R-MA – hyperfractionated cyclophosphamide, vincristine, doxorubicin and dexamethasone, alternating with rituximab/ high-dose methotrexate and cytarabine; R – rituximab; R-CHOP – Rituximab CHOP; R-COPADEM – methotrexate, cyclophosphamide, vincristine, doxorubicin, prednisolone, rituximab; R-CDOP – rituximab, cyclophosphamide, pegylated liposomal doxorubicin, vincristine and prednisone; R-CEOP – rituximab, cyclophosphamide, epirubicine, vincristine and prednisone); R-mini CHOP – rituximab combined with low-dose CHOP); rR-CHOP – Reduced R-CHOP; RT – radiotherapy; WBRT – whole brain irradiation.
